# Supplementary material
Source: Springer Nature journal article supplement (https://www.springermedizin.de/resource/supplementary/13046_2011_481_MOESM1_ESM.pdf/9662308)
Supplement: MOESM1 [file 9662308]

**5 RCTs included in the meta-analysis (3,841 pts)**

**Primary Outcomes**

**Secondary Outcomes**

**5 RCTs evaluable for PFS (3,841 pts)**

**5 RCTs evaluable for ORR, HTN, Bleeding, Proteinuria, Thrombosis (3,841 pts)**

Data not available for 1 RCT (462pts)

Data not available for 1 RCT (462 pts)

**4 RCTs evaluable for OS (3,379 pts)**

**4 RCTs evaluable for Neuro, FN, GI Perforation (3,379 pts)**
